# Supplementary material for: Scandium triflate catalyzed cycloaddition of imines with 1,1-cyclopropanediesters: efficient and diastereoselective synthesis of multisubstituted pyrrolidines
Source: Royal Society of Chemistry journal article supplement (doi:10.1039/b512195g), 2005-12-06

## SUPPLEMENTARY INFORMATION

# Scandium Triflate Catalyzed Cycloaddition of Imines with 1,1-Cyclopropanediester: Efficient and Diastereoselective Synthesis of Multisubstituted Pyrrolidines

Yan-Biao Kang, Yong Tang\* and Xiu-Li Sun

State Key Laboratory of Organometallic Chemistry, Shanghai Institute of Organic Chemistry, Chinese Academy of Sciences, 354 Fenglin Lu, Shanghai 200032, China. Fax: (+86) 21-54925078; E-mail: [tangy@mail.sioc.ac.cn](mailto:tangy@mail.sioc.ac.cn).

### Part 1. Spectral data (<sup>1</sup>H NMR, <sup>13</sup>C NMR, IR, LRMS, HRMS and E.A.).

**(cis, E)-Dimethyl 1-benzyl-2-phenyl-5-styrylpyrrolidine-3,3-dicarboxylate (3b):** colorless oil (91% yield). <sup>1</sup>H NMR (300 MHz, CDCl<sub>3</sub>): δ 7.44 (d, *J* = 6.9 Hz, 1H), 7.31-7.07 (m, 13H), 6.55 (d, *J* = 16.2 Hz, 1H), 6.16 (dd, *J* = 11.4, 15.9 Hz, 1H), 4.67 (s, 1H), 3.83 (d, *J* = 14.1 Hz, 1H), 3.70 (s, 3H), 3.64 (d, *J* = 14.1 Hz, 1H), 3.42-3.34 (m, 1H), 3.06 (s, 3H), 2.81 (dd, *J*<sub>AB</sub> = 13.5 Hz, *J*<sub>AX</sub> = 10.8 Hz, 1H), 2.25 (dd, *J*<sub>AB</sub> = 13.5 Hz, *J*<sub>BX</sub> = 6.6 Hz, 1H); <sup>13</sup>C NMR (75 MHz, CDCl<sub>3</sub>): δ 171.96, 169.55, 139.24, 136.87, 136.51, 131.98, 131.66, 129.82, 128.84, 128.41, 127.75, 127.70, 127.54, 127.44, 126.73, 126.34, 70.54, 63.95, 63.92, 54.07, 52.77, 51.96, 39.23; LRMS-ESI: 456.1 (M + H)<sup>+</sup>; IR (thin film, cm<sup>-1</sup>): 3027, 2951, 2830, 1733, 967, 755, 699; HRMS-ESI: Exact mass calcd for C<sub>29</sub>H<sub>30</sub>NO<sub>4</sub> [M + H]<sup>+</sup>, 456.2169. Found 456.2167.

**(cis, E)-Dimethyl 1-benzyl-2-(4-fluorophenyl)-5-styryl pyrrolidine-3,3-dicarboxylate (3c):** colorless oil (94% yield). <sup>1</sup>H NMR (300 MHz, CDCl<sub>3</sub>): δ 7.41-7.21 (m, 7H), 7.17-7.04 (m, 5H), 6.94 (t, *J* = 8.7 Hz, 2H), 6.60 (d, *J* = 15.9 Hz, 1H), 6.16 (dd, *J* = 8.4, 15.9 Hz, 1H), 4.65 (s, 1H), 3.78 (d, *J* = 13.8 Hz, 1H), 3.71 (s, 3H), 3.66 (d, *J* = 13.8 Hz, 1H), 3.42-3.34 (m, 1H), 3.12 (s, 3H), 2.79 (dd, *J*<sub>AB</sub> = 13.2 Hz, *J*<sub>AX</sub> = 10.8 Hz, 1H), 2.17 (dd, *J*<sub>AB</sub> = 13.2 Hz, *J*<sub>BX</sub> = 6.0 Hz, 1H); <sup>13</sup>C NMR (75 MHz, CDCl<sub>3</sub>): δ 171.86, 169.41, 162.15 (d, <sup>1</sup>*J*<sub>CF</sub> = 241.90 Hz), 136.79, 136.50, 135.11, 135.07, 132.20, 131.41, 130.37 (d, <sup>3</sup>*J*<sub>CF</sub> = 8.1 Hz), 129.74, 128.44, 127.62 (d, <sup>4</sup>*J*<sub>CF</sub> = 2.9 Hz), 126.80, 126.36, 114.51 (d, <sup>2</sup>*J*<sub>CF</sub> = 20.62 Hz), 69.95, 64.04, 63.88, 54.30, 52.81, 52.03, 39.09; LRMS-ESI: 474.0 [(M + H)<sup>+</sup>, 100]; IR (thin film, cm<sup>-1</sup>): 2951, 1734, 1508, 1271, 1222, 751, 696; HRMS-ESI: Exact mass calcd for C<sub>29</sub>H<sub>29</sub>ClNO<sub>4</sub> [M + H]<sup>+</sup>, 474.2075. Found 474.2076.

**(cis)-Dimethyl 1-benzyl-2-(4-chlorophenyl)-5-styryl pyrrolidine-3,3-dicarboxylate (3d):** white solid (92% yield). <sup>1</sup>H NMR (300 MHz, CDCl<sub>3</sub>): δ 7.37-7.03 (m, 14H), 6.57 (d, *J* = 15.6 Hz, 1H), 6.16 (dd, *J* = 8.1, 15.9 Hz, 1H), 4.64 (s, 1H), 3.77 (d, *J* = 13.5 Hz, 1H), 3.71 (s, 3H), 3.65 (d, *J* = 13.5 Hz, 1H), 3.38 (ddd, *J* = 6.3, 8.1, 12.9 Hz, 1H), 2.78 (dd, *J*<sub>AB</sub> = 13.5 Hz, *J*<sub>AX</sub> = 10.2 Hz, 1H), 2.27 (dd, *J*<sub>AB</sub> = 13.5 Hz, *J*<sub>BX</sub> = 6.3 Hz, 1H); <sup>13</sup>C NMR (75 MHz, CDCl<sub>3</sub>): δ 171.77, 169.32, 137.97, 136.75, 136.31, 133.13, 132.26, 131.30, 130.18, 129.76, 128.45, 127.85, 127.77, 127.53, 126.85, 126.37, 69.87, 63.99, 63.86, 54.22, 52.86, 52.09, 39.07; LRMS-EI: 490 [(M + H)<sup>+</sup>, 2.27], 91 (100); IR (thin film, cm<sup>-1</sup>): 3467, 3028, 2950, 2815, 1732, 1489, 1088, 967, 699; Anal. Calcd. for C<sub>29</sub>H<sub>28</sub>ClNO<sub>4</sub>: C, 71.09; H, 5.76; N, 2.86. Found: C, 71.20; H, 5.83; N, 2.61.

**(cis, E)-Dimethyl 1-benzyl-2-(4-bromophenyl)-5-styryl pyrrolidine-3,3-dicarboxylate (3e):** colorless oil (71% yield). <sup>1</sup>H NMR (300 MHz, CDCl<sub>3</sub>): δ 7.40-7.03 (m, 14H), 6.56 (d, *J* = 15.9 Hz, 1H), 6.16 (dd, *J* = 8.1, 15.9 Hz, 1H), 4.62 (s, 1H), 3.77 (d, *J* = 14.1 Hz, 1H), 3.72 (s, 3H), 3.65 (d, *J* = 14.1 Hz, 1H), 3.38 (ddd, *J* = 6.3, 8.4, 10.5 Hz, 1H), 3.13 (s, 3H), 2.77 (dd, *J*<sub>AB</sub> = 13.5 Hz, *J*<sub>AX</sub> = 10.5 Hz, 1H), 2.27 (dd, *J*<sub>AB</sub> = 13.5 Hz, *J*<sub>BX</sub> = 6.6 Hz, 1H); <sup>13</sup>C NMR (75 MHz, CDCl<sub>3</sub>): δ 171.77, 169.32, 138.53, 136.77, 136.30, 132.28, 131.31, 130.82, 130.57, 129.78, 128.47, 127.80, 127.54, 126.88, 126.38, 121.36, 69.96, 64.00, 63.86, 54.23, 52.87, 52.12, 39.10; LRMS-ESI: 534.0 [(M + H)<sup>+</sup>, 100]; IR (thin film, cm<sup>-1</sup>): 3030, 2948, 1737, 1270; HRMS-ESI: Exact mass calcd for C<sub>29</sub>H<sub>29</sub>BrNO<sub>4</sub> [M + H]<sup>+</sup>, 534.1274. Found 534.1273.

**(cis, E)-Dimethyl 1-benzyl-2-(4-(methoxycarbonyl)phenyl)-5-styrylpyrrolidine-3,3-dicarboxylate (3f):** Reaction was performed at refluxed CH<sub>2</sub>Cl<sub>2</sub>: colorless oil (52% yield). <sup>1</sup>H NMR (300 MHz, CDCl<sub>3</sub>): δ 7.93 (d, *J* = 8.4 Hz, 2H), 7.48 (d, *J* = 8.1 Hz, 2H), 7.37-7.22 (m, 5H), 7.17-7.03 (m, 5H), 6.59 (d, *J* = 15.9 Hz, 1H), 6.20 (dd, *J* = 8.4, 15.9 Hz, 1H), 4.73 (s, 1H), 3.91 (s, 3H), 3.78 (d, *J* = 13.5 Hz, 1H), 3.74 (s, 3H), 3.68 (d, *J* = 13.5 Hz, 1H), 3.43 (ddd, *J* = 6.3, 7.8, 10.5 Hz, 1H), 3.07 (s, 1H), 2.81 (dd, *J*<sub>AB</sub> = 13.5 Hz, *J*<sub>AX</sub> = 10.8 Hz, 1H), 2.30 (dd, *J*<sub>AB</sub> = 13.5

Hz,  $J_{BX} = 6.0$  Hz, 1H);  $^{13}\text{C}$  NMR (75 MHz,  $\text{CDCl}_3$ ):  $\delta$  171.74, 169.13, 167.02, 145.11, 136.77, 136.37, 132.38, 131.22, 129.77, 129.23, 128.98, 128.88, 128.49, 127.79, 127.57, 126.90, 126.41, 70.31, 64.22, 64.12, 54.58, 52.94, 52.07, 52.02, 39.20; LRMS-ESI: 514.0 [(M + H) $^+$ , 100]; IR (thin film,  $\text{cm}^{-1}$ ): 3430, 2952, 1733, 1435, 766, 750, 705; HRMS-ESI: Exact mass calcd for  $\text{C}_{31}\text{H}_{32}\text{NO}_6$  [M + H] $^+$ , 514.2224. Found 514.2225.

**(cis, E)-Dimethyl 1-benzyl-5-styryl-2-p-tolylpyrrolidine-3,3-dicarboxylate (3g):** colorless oil (86% yield).  $^1\text{H}$  NMR (300 MHz,  $\text{CDCl}_3$ ):  $\delta$  7.35-7.08 (m, 14H), 6.54 (d,  $J = 15.9$  Hz, 1H), 6.18 (dd,  $J = 7.8, 15.9$  Hz, 1H), 4.62 (s, 1H), 3.84 (d,  $J = 14.3$  Hz, 1H), 3.70 (s, 3H), 3.60 (d,  $J = 14.3$  Hz, 1H), 3.36 (ddd,  $J = 6.3, 8.1, 10.4$  Hz, 1H), 3.10 (s, 1H), 2.78 (dd,  $J_{AB} = 12.9$  Hz,  $J_{AX} = 10.5$  Hz, 1H), 2.31 (s, 3), 2.24 (dd,  $J_{AB} = 12.9$  Hz,  $J_{BX} = 6.0$  Hz, 1H);  $^{13}\text{C}$  NMR (75 MHz,  $\text{CDCl}_3$ ):  $\delta$  172.01, 169.71, 137.13, 136.94, 136.53, 136.02, 131.86, 131.84, 129.86, 128.76, 128.50, 128.41, 127.72, 127.39, 126.71, 126.35, 70.29, 63.81, 63.79, 53.84, 52.71, 51.98, 39.22, 21.12; LRMS-ESI: 470.1 [(M + H) $^+$ , 100]; IR (thin film,  $\text{cm}^{-1}$ ): 3472, 3060, 3027, 1734, 1270, 750, 696; HRMS-ESI: Exact mass calcd for  $\text{C}_{30}\text{H}_{32}\text{NO}_4$  [M + H] $^+$ , 470.2326. Found 470.2328.

**(cis, E)-Dimethyl 1-benzyl-2-(4-methoxyphenyl)-5-styryl pyrrolidine-3,3-dicarboxylate (3h):** white solid (86% yield).  $^1\text{H}$  NMR (300 MHz,  $\text{CDCl}_3$ ):  $\delta$  7.38-7.07 (m, 12H), 6.82 (d,  $J = 8.7$  Hz, 2H), 6.54 (d,  $J = 15.9$  Hz, 1H), 6.15 (dd,  $J = 8.1, 15.9$  Hz, 1H), 4.60 (s, 1H), 3.82 (d,  $J = 14.3$  Hz, 1H), 3.79 (s, 3H), 3.70 (s, 3H), 3.61 (d,  $J = 14.3$  Hz, 1H), 3.35 (ddd,  $J = 6.3, 8.1, 9.0$  Hz, 1H), 2.78 (dd,  $J_{AB} = 13.5$  Hz,  $J_{AX} = 10.5$  Hz, 1H), 2.24 (dd,  $J_{AB} = 13.5$  Hz,  $J_{BX} = 6.4$  Hz, 1H);  $^{13}\text{C}$  NMR (75 MHz,  $\text{CDCl}_3$ ):  $\delta$  172.02, 169.72, 158.90, 136.88, 136.48, 131.87, 131.76, 131.05, 129.90, 129.80, 128.39, 127.70, 127.39, 126.69, 126.32, 113.14, 69.98, 63.75, 63.70, 55.16, 53.79, 52.71, 52.08, 39.11; LRMS-EI: 486 [(M + H) $^+$ , 3.80], 91 (100); IR (thin film,  $\text{cm}^{-1}$ ): 3026, 3001, 2950, 2837, 1731; Anal. Calcd. for  $\text{C}_{30}\text{H}_{31}\text{NO}_5$ : C, 74.21; H, 6.43; N, 2.88. Found: C, 74.11; H, 6.64; N, 2.71.

**(cis, E)-dimethyl 1-benzyl-2-(2-methoxyphenyl)-5-styryl pyrrolidine-3,3-dicarboxylate (3i):** colorless oil (59% yield).  $^1\text{H}$  NMR (300 MHz,  $\text{CDCl}_3$ ):  $\delta$  7.59 (d,  $J = 6.9$  Hz, 1H), 7.29 (d,  $J = 4.5$  Hz, 4H), 7.25-7.18 (m, 1H), 7.14-7.02 (m, 6H), 6.89 (t,  $J = 7.5$  Hz, 1H), 6.79 (d,  $J = 8.4$  Hz, 1H), 6.56 (d,  $J = 15.9$  Hz, 1H), 6.10 (dd,  $J = 8.1, 15.9$  Hz, 1H), 5.36 (s, 1H), 3.78-3.66 (m, 8H), 3.42 (ddd,  $J = 5.1, 8.1, 11.4$  Hz, 1H), 3.04 (s, 3H), 2.85 (dd,  $J_{AB} = 12.9$  Hz,  $J_{AX} = 12.9$  Hz, 1H), 2.21 (dd,  $J_{AB} = 12.9$  Hz,  $J_{BX} = 5.1$  Hz, 1H);  $^{13}\text{C}$  NMR (75 MHz,  $\text{CDCl}_3$ ):  $\delta$  172.01, 169.52, 157.61, 137.63, 136.96, 131.85, 131.81, 129.68, 129.57, 128.87, 128.39, 128.16, 127.40, 127.35, 126.44, 126.31, 120.02, 109.82, 64.45, 63.65, 62.83, 55.67, 55.54, 52.77, 51.77, 40.34; LRMS-ESI: 486.1 [(M + H) $^+$ , 100]; IR (thin film,  $\text{cm}^{-1}$ ): 3030, 2950, 2830, 1732, 966, 751, 697; HRMS-ESI: Exact mass calcd for  $\text{C}_{30}\text{H}_{32}\text{NO}_5$  [M + H] $^+$ , 486.2275. Found 486.2274.

**(cis, E)-Dimethyl 1-benzyl-2-(2,4-dichlorophenyl)-5-styryl pyrrolidine-3,3-dicarboxylate (3j):** colorless oil (59% yield).  $^1\text{H}$  NMR (300 MHz,  $\text{CDCl}_3$ ):  $\delta$  7.56 (d,  $J = 8.4$  Hz, 1H), 7.39-7.24 (m, 5H), 7.13-7.07 (m, 7H), 6.64 (d,  $J = 15.9$  Hz, 1H), 6.15 (dd,  $J = 8.1, 15.9$  Hz, 1H), 5.34 (s, 1H), 3.80 (d,  $J = 13.2$  Hz, 1H), 3.75 (s, 3H), 3.65 (d,  $J = 13.2$  Hz, 1H), 3.48 (ddd,  $J = 4.8, 8.1, 11.7$  Hz, 1H), 3.13 (s, 3H), 2.82 (dd,  $J_{AB} = 13.2$  Hz,  $J_{AX} = 10.2$  Hz, 1H), 2.27 (dd,  $J_{AB} = 13.2$  Hz,  $J_{BX} = 4.8$  Hz, 1H);  $^{13}\text{C}$  NMR (75 MHz,  $\text{CDCl}_3$ ):  $\delta$  172.42, 168.75, 137.09, 136.83, 136.64, 134.82, 133.15, 132.83, 131.84, 130.78, 129.61, 128.52, 128.02 (3C), 127.66, 126.80 (3C), 126.39, 65.77, 64.41, 63.75, 55.91, 53.11, 51.93, 39.94; LRMS-EI: 524 [(M + H) $^+$ , 0.12], 84 (100), 91 (7.86); IR (thin film,  $\text{cm}^{-1}$ ): 3022, 2807, 1736, 967, 914, 750, 697; HRMS-ESI: Exact mass calcd for  $\text{C}_{29}\text{H}_{28}\text{Cl}_2\text{NO}_4$  [M + H] $^+$ , 524.1390. Found 524.1389.

**(cis, E)-Dimethyl 2-(benzo[d][1,3]dioxol-5-yl)-1-benzyl-5-styryl pyrrolidine-3,3-dicarboxylate (3k):** white solid (94% yield).  $^1\text{H}$  NMR (300 MHz,  $\text{CDCl}_3$ ):  $\delta$  7.31-7.08 (m, 10H), 6.99 (d,  $J = 1.2$  Hz, 1H), 6.90 (dd,  $J = 1.8, 8.7$  Hz, 1H), 6.72 (d,  $J = 7.8$  Hz, 1H), 6.54 (d,  $J = 16.2$  Hz, 1H), 6.14 (dd,  $J = 7.8, 16.2$  Hz, 1H), 5.90 (s, 2H), 4.58 (s, 1H), 3.81 (d,  $J = 14.1$  Hz, 1H), 3.69 (s, 3H), 3.64 (d,  $J = 14.1$  Hz, 1H), 3.34 (ddd,  $J = 6.9, 9.0, 10.8$  Hz, 1H), 3.21 (s, 3H), 2.77 (dd,  $J_{AB} = 12.9$  Hz,  $J_{AX} = 10.5$  Hz, 1H), 2.24 (dd,  $J_{AB} = 2.9$  Hz,  $J_{BX} = 6.3$  Hz, 1H);  $^{13}\text{C}$  NMR (75 MHz,  $\text{CDCl}_3$ ):  $\delta$  171.87, 169.50, 147.15, 146.78, 136.81, 136.45, 133.12, 131.98, 131.58, 129.79, 128.39, 127.70, 127.41, 126.73, 126.32, 122.26, 109.10, 107.52, 100.77, 70.19, 63.74, 63.70, 53.93, 52.71, 52.11, 39.04; LRMS-EI: 500 [(M + H) $^+$ , 3.99], 91 (100); IR (thin film,  $\text{cm}^{-1}$ ): 3027, 2874, 1733, 802, 751, 697, 625; Anal. Calcd. for  $\text{C}_{30}\text{H}_{29}\text{NO}_6$ : C, 72.13; H, 5.85; N, 2.80. Found: C, 72.11; H, 5.93; N, 2.77.

**(cis)-Diethyl 1-benzyl-2-(4-chlorophenyl)-5-vinyl pyrrolidine-3,3-dicarboxylate (3l):** colorless oil (92% yield).  $^1\text{H}$  NMR (300 MHz,  $\text{CDCl}_3$ ):  $\delta$  7.31-7.25 (m, 2H), 7.18-7.13 (m, 5H), 7.04-7.01 (m, 2H), 5.84 (ddd,  $J = 8.1, 9.9, 17.4$  Hz, 1H), 5.27 (d,  $J = 17.1$  Hz, 1H), 5.16 (d,  $J = 9.9$  Hz, 1H), 4.60 (s, 1H), 4.27-4.06 (m, 2H), 3.76-3.60 (m, 3H), 3.45-3.32 (m, 1H), 3.25-3.17 (m, 1H), 2.69 (dd,  $J_{AB} = 13.5$  Hz,  $J_{AX} = 10.8$  Hz, 1H), 2.21 (dd,  $J_{AB} = 13.5$  Hz,  $J_{BX} = 6.3$  Hz, 1H), 1.20 (t,  $J = 7.2$  Hz, 3H), 0.81 (t,  $J = 7.2$  Hz, 3H);  $^{13}\text{C}$  NMR (75 MHz,  $\text{CDCl}_3$ ):  $\delta$  171.26, 168.80, 139.66, 138.34, 136.37, 132.91, 130.27, 129.73, 127.63, 126.74 (3C), 117.26, 69.52, 64.36, 63.83, 61.56, 61.16, 54.08, 38.91, 13.87, 13.82; LRMS-EI: 442 [(M + H) $^+$ , 0.12], 91 (100); IR (thin film,  $\text{cm}^{-1}$ ): 2982, 2815, 1731, 924, 701; HRMS-ESI: Exact mass calcd for  $\text{C}_{25}\text{H}_{29}\text{ClNO}_4$  [M + H] $^+$ , 442.1780. Found 442.1777.

**(cis)-Diethyl 1-benzyl-2-(4-chlorophenyl)-5-phenylpyrrolidine-3,3-dicarboxylate (3m):** colorless oil (85% yield).  $^1\text{H}$  NMR (300 MHz,  $\text{CDCl}_3$ ):  $\delta$  7.62-7.59 (m, 2H), 7.45-7.38 (m, 4H), 7.33-7.22 (m, 3H), 7.14-7.12 (m, 3H), 6.89-6.86 (m, 2H), 4.70 (s, 1H), 4.27-4.06 (m, 2H), 3.77-3.66 (m, 2H), 3.62 (d,  $J = 14.0$  Hz, 1H), 3.54 (d,  $J = 14.0$  Hz, 1H), 3.44-3.34 (m, 1H), 2.85 (dd,  $J_{AB} = 13.5$  Hz,  $J_{AX} = 11.1$  Hz, 1H), 2.42 (dd,  $J_{AB} = 13.5$  Hz,  $J_{BX} = 6.6$  Hz, 1H), 1.18 (t,  $J = 7.2$  Hz, 3H), 0.80 (t,  $J = 7.2$  Hz, 3H);  $^{13}\text{C}$  NMR (75 MHz,  $\text{CDCl}_3$ ):  $\delta$  171.28, 169.02, 141.45, 138.14, 134.78, 133.00, 130.44, 130.06, 128.56, 127.86, 127.78, 127.61, 127.57, 126.88, 68.69, 64.24, 63.72, 61.51, 61.20,

52.69, 42.09, 13.86, 13.31; LRMS-EI: 492 (M + H)<sup>+</sup>, 91 (100); IR (thin film, cm<sup>-1</sup>): 2981, 1732, 1489, 1260, 702; HRMS-ESI: Exact mass calcd for C<sub>29</sub>H<sub>31</sub>ClNO<sub>4</sub> [M + H]<sup>+</sup>, 492.1936. Found 492.1936.

**(cis)-Dimethyl 1-benzyl-2-(4-chlorophenyl)-5-phenylpyrroli dine-3,3-dicarboxylate (3o):** Reaction was performed at refluxed CH<sub>2</sub>Cl<sub>2</sub>: colorless oil (98% yield). <sup>1</sup>H NMR (300 MHz, CDCl<sub>3</sub>): δ 7.60 (d, *J* = 6.6 Hz, 2H), 7.42 (dd, *J* = 8.1, 8.7 Hz, 4H), 7.34-7.24 (m, 3H), 7.15-7.13 (m, 3H), 6.88-6.85 (m, 2H), 4.69 (s, 1H), 3.76-3.68 (m, 1H), 3.69 (s, 3H), 3.62 (d, *J* = 14.4 Hz, 1H), 3.53 (d, *J* = 14.4 Hz, 1H), 3.11 (s, 3H), 2.84 (dd, *J*<sub>AB</sub> = 13.5 Hz, *J*<sub>AX</sub> = 10.5 Hz, 1H), 2.41 (dd, *J*<sub>AB</sub> = 13.5 Hz, *J*<sub>BX</sub> = 6.3 Hz, 1H); <sup>13</sup>C NMR (75 MHz, CDCl<sub>3</sub>): δ 171.80, 169.48, 141.37, 137.91, 134.64, 133.14, 130.33, 130.13, 128.64, 127.92, 127.91, 127.70, 127.66, 126.97, 68.86, 64.20, 63.79, 52.80, 52.53, 52.07, 41.96; LRMS-EI: 464 [(M + H)<sup>+</sup>, 0.93], 91 (100); IR (thin film, cm<sup>-1</sup>): 3028, 2951, 2830, 1735, 1489, 1267, 1199, 760, 515; HRMS-ESI: Exact mass calcd for C<sub>27</sub>H<sub>27</sub>ClNO<sub>4</sub> [M + H]<sup>+</sup>, 464.1623. Found 464.1625.

# Part 2. $^1\text{H}$ NMR and $^{13}\text{C}$ NMR spectra for all new compounds

3b

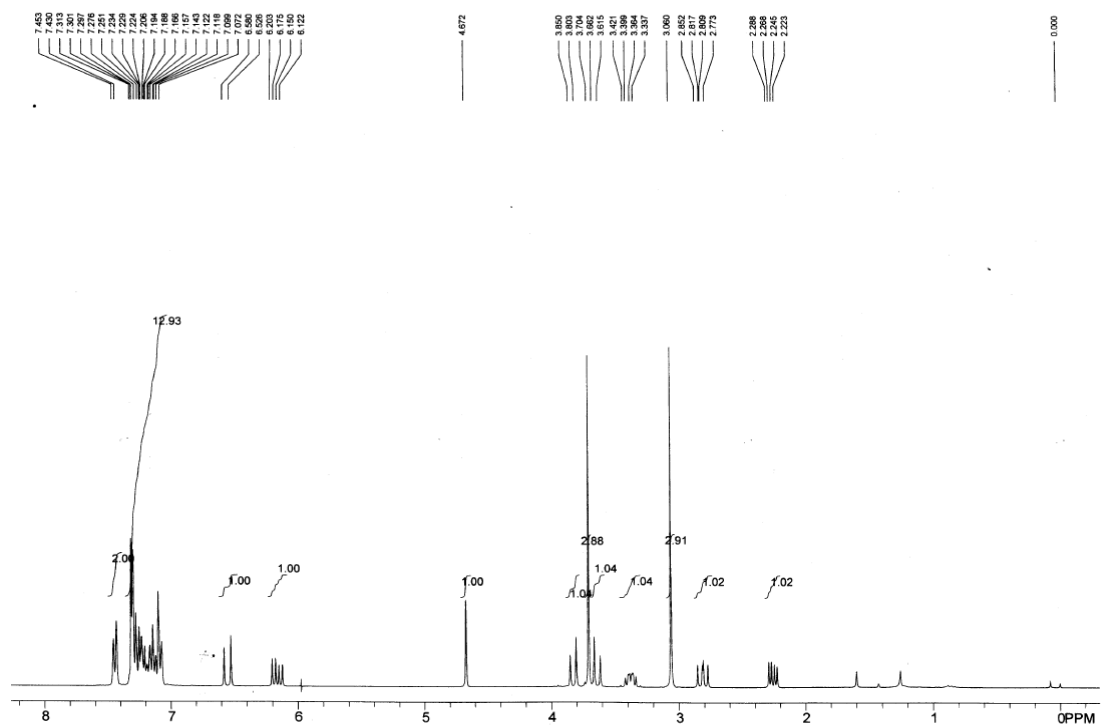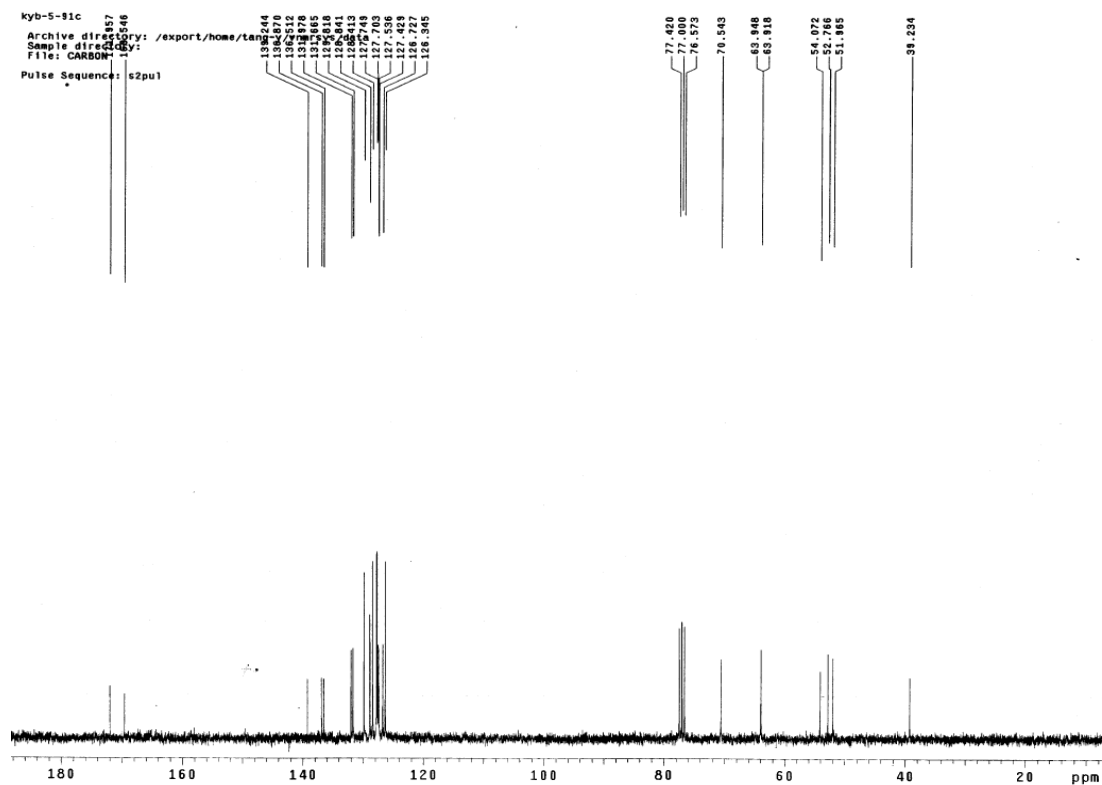

3c

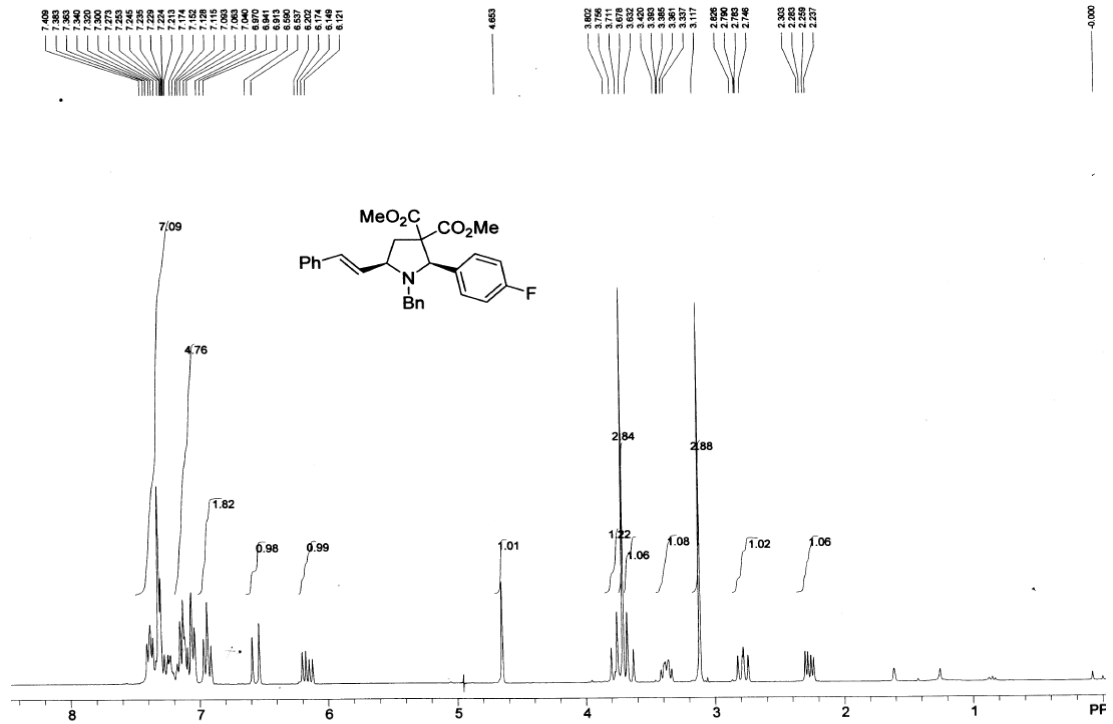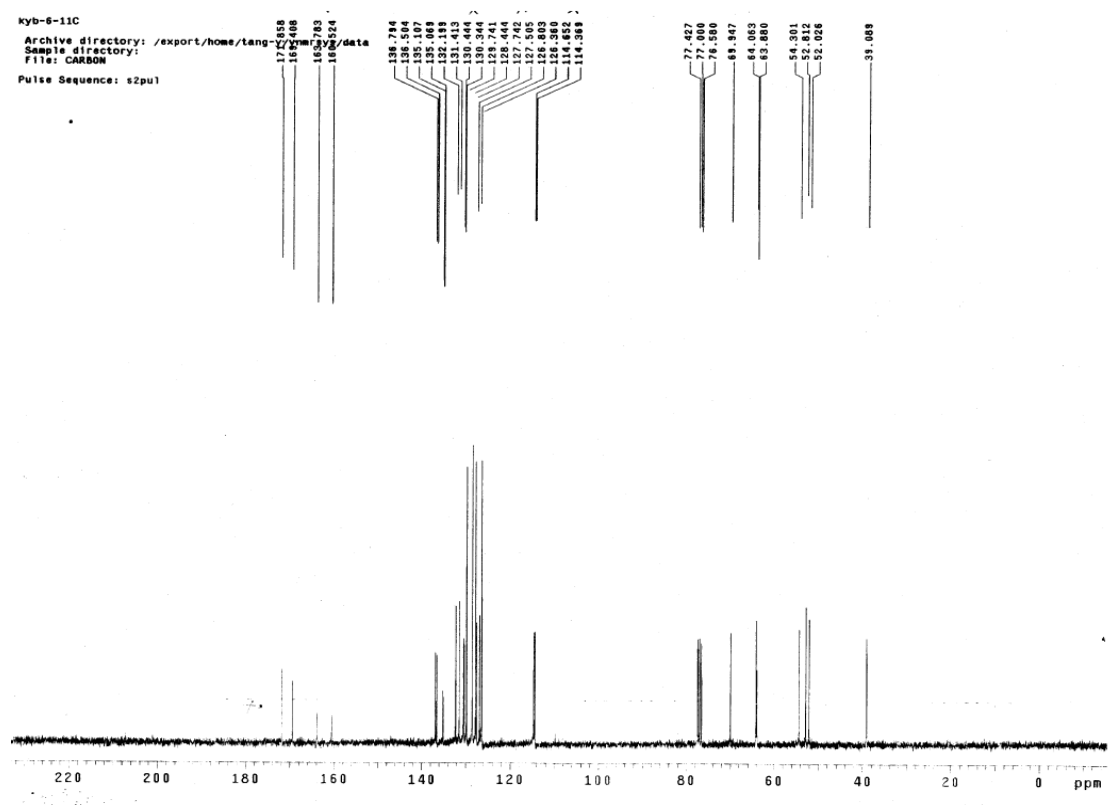

3d

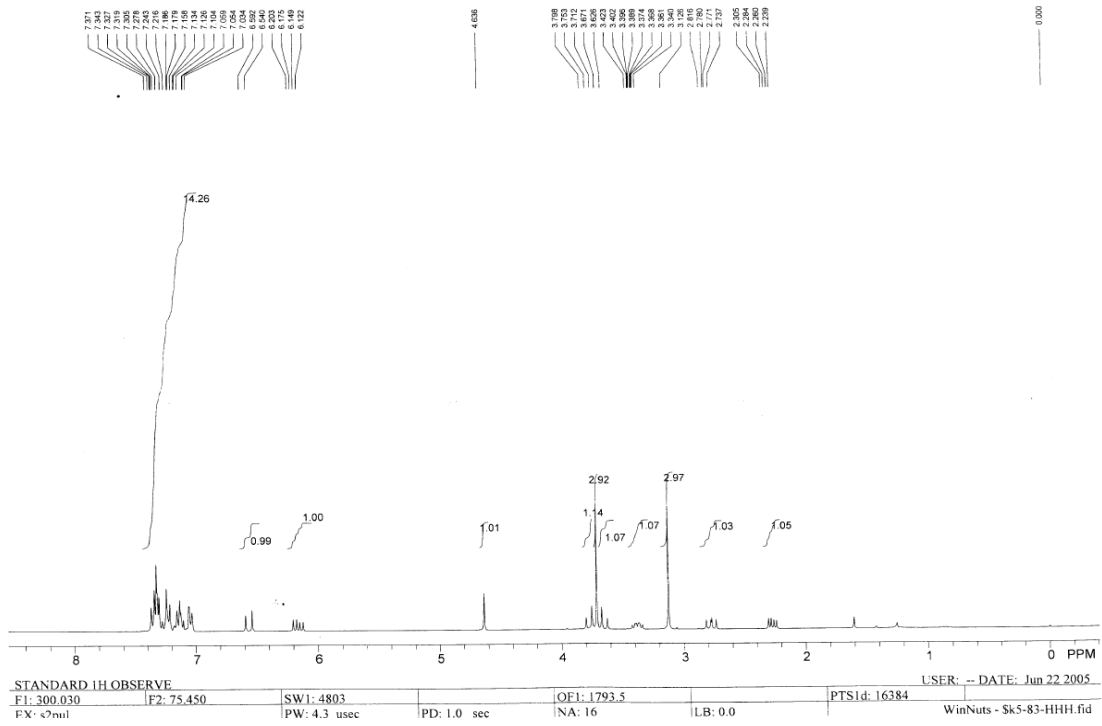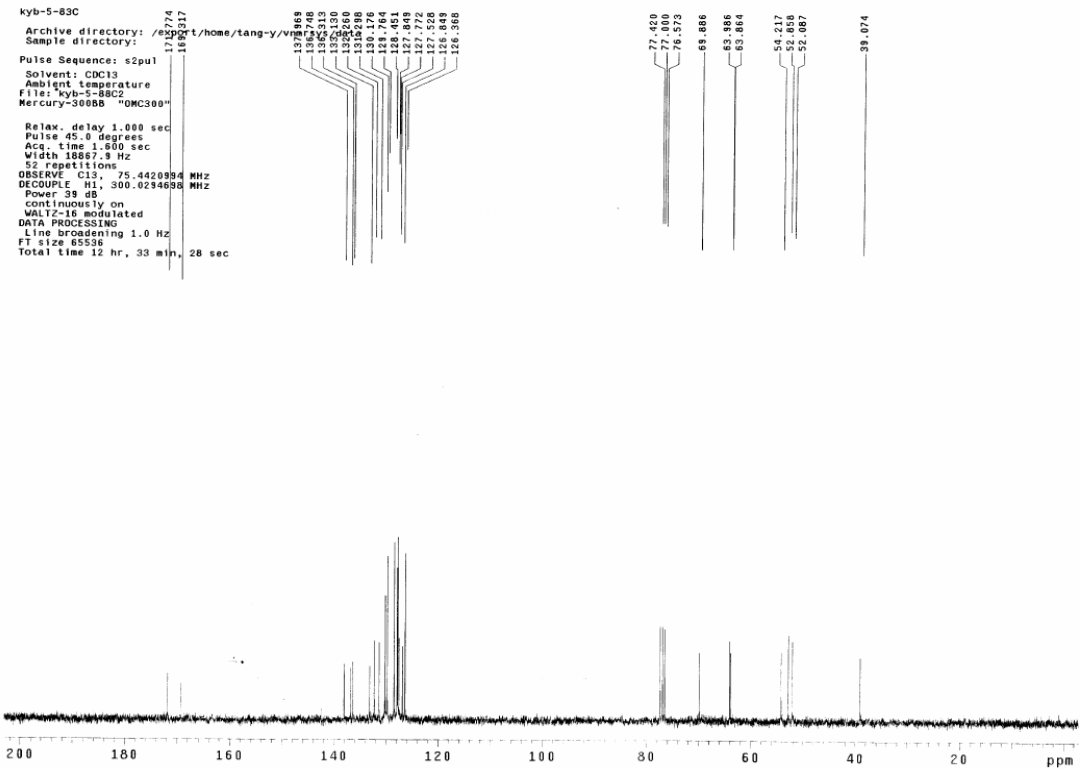

3e

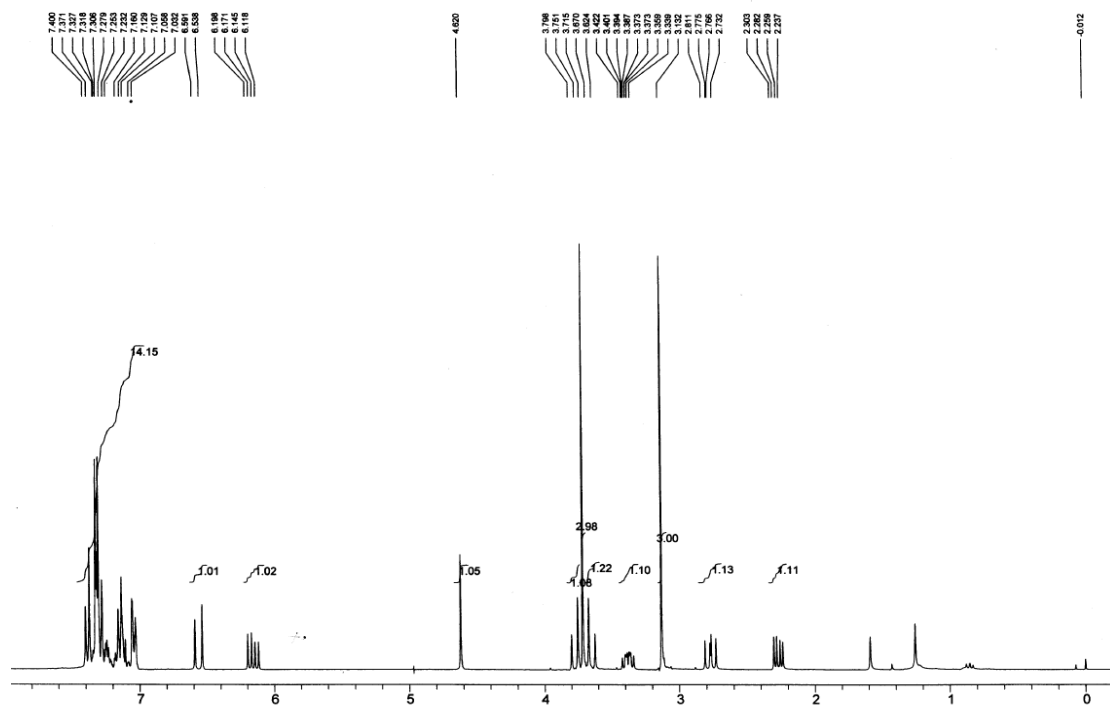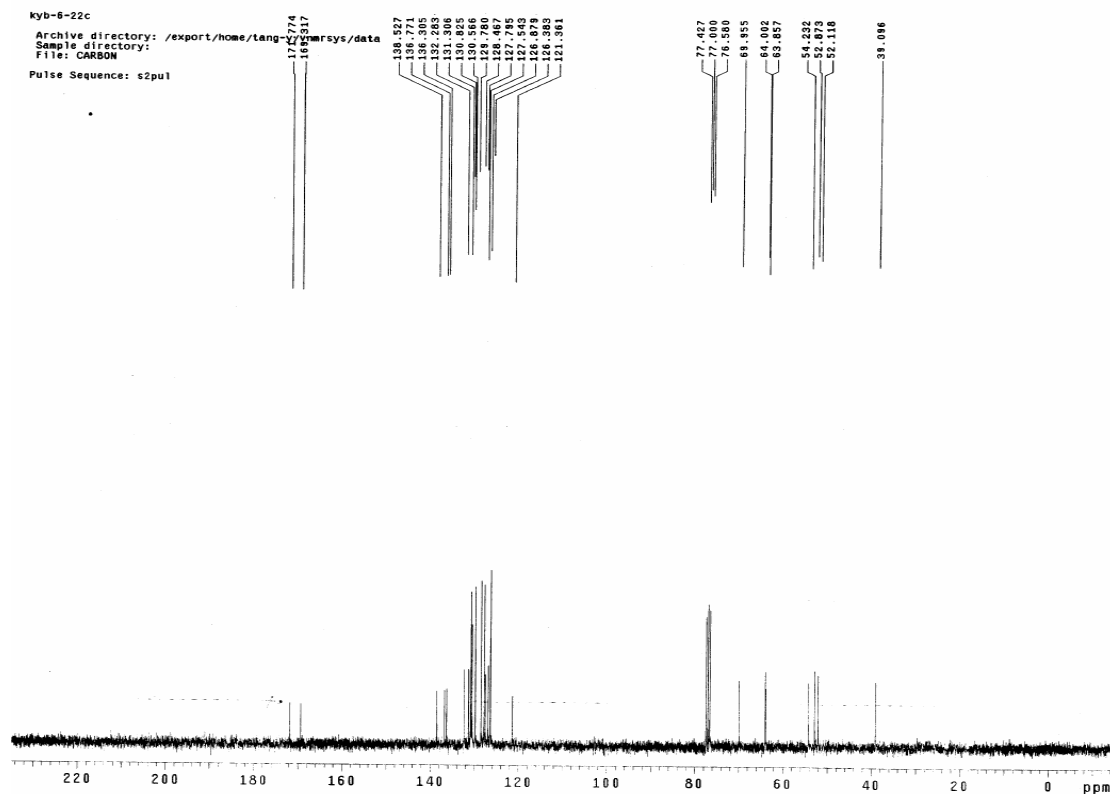

3f

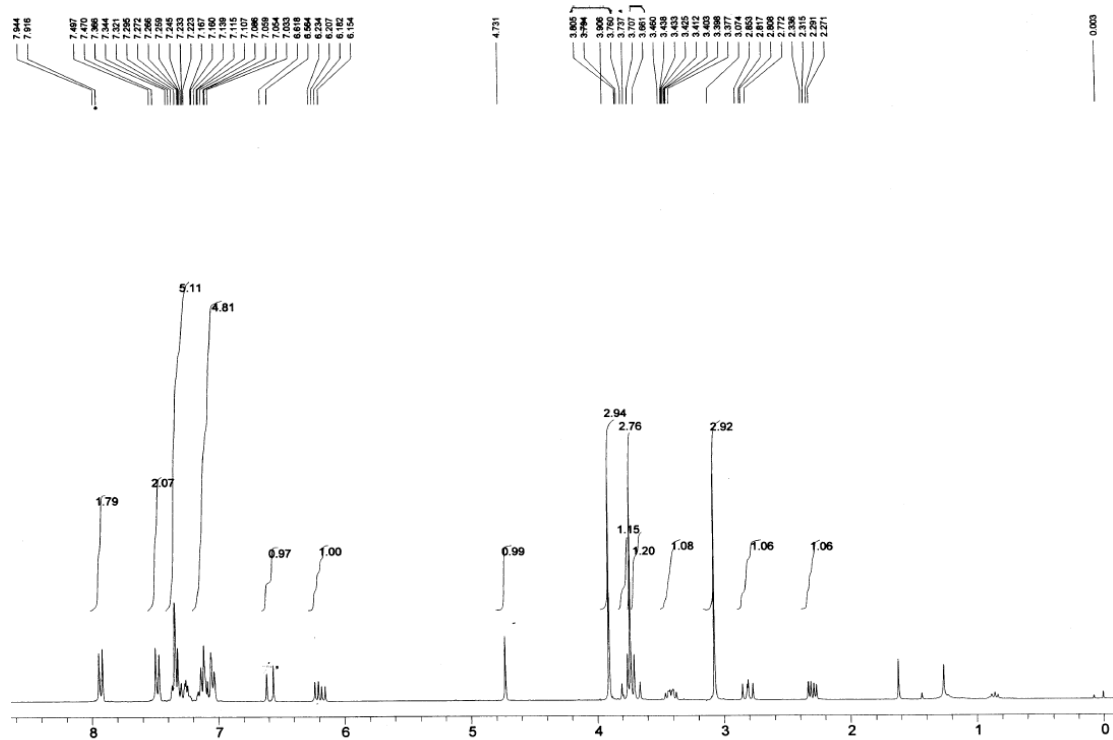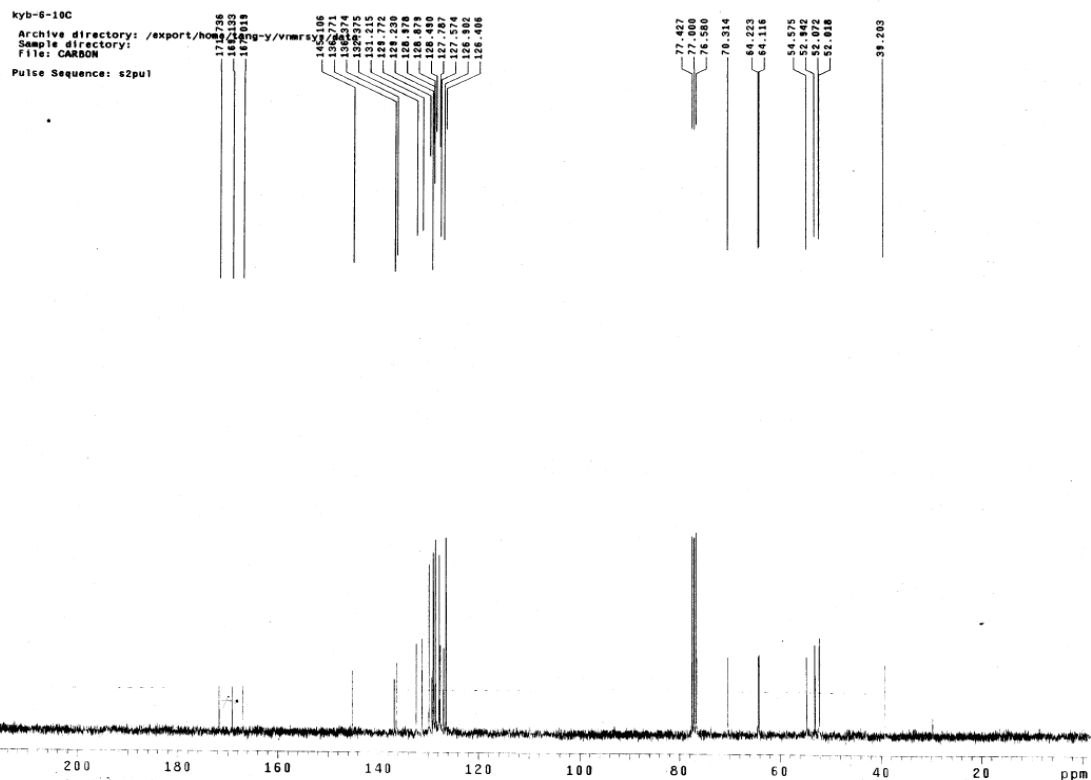



3g

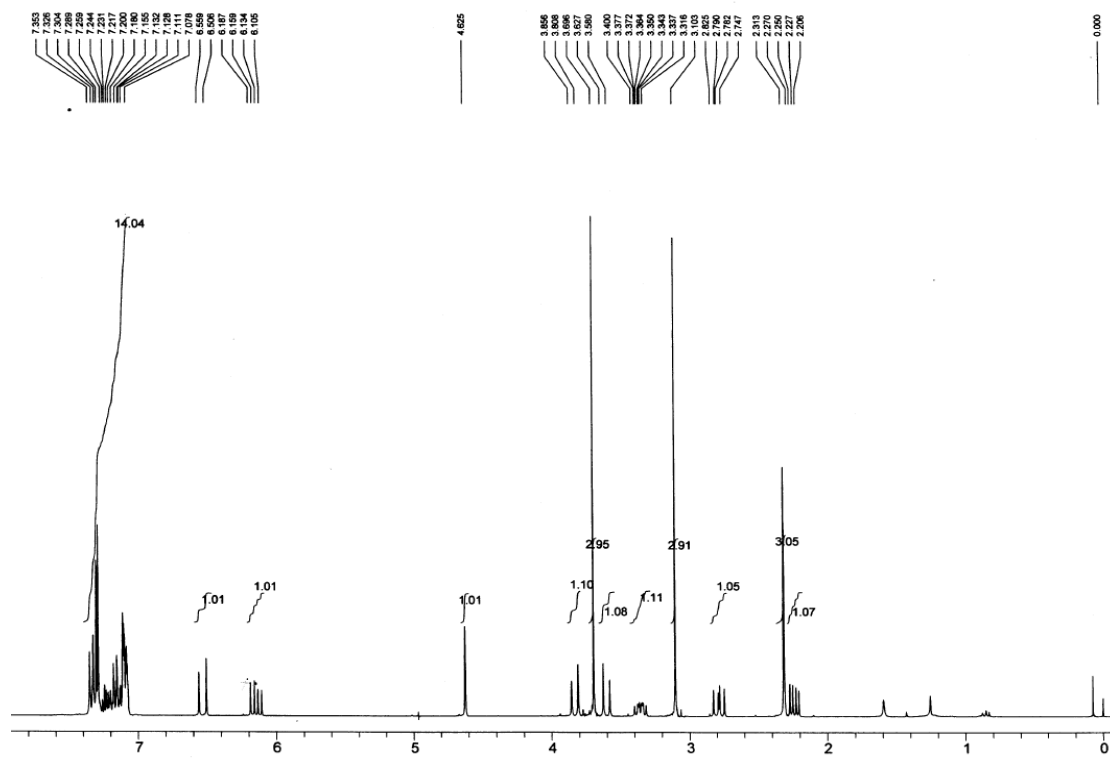

Kyb-6-19C

Archive directory: /usr/local/home/lang-y/  
Sample directory:  
File: CARBON  
Pulse Sequence: s2pul

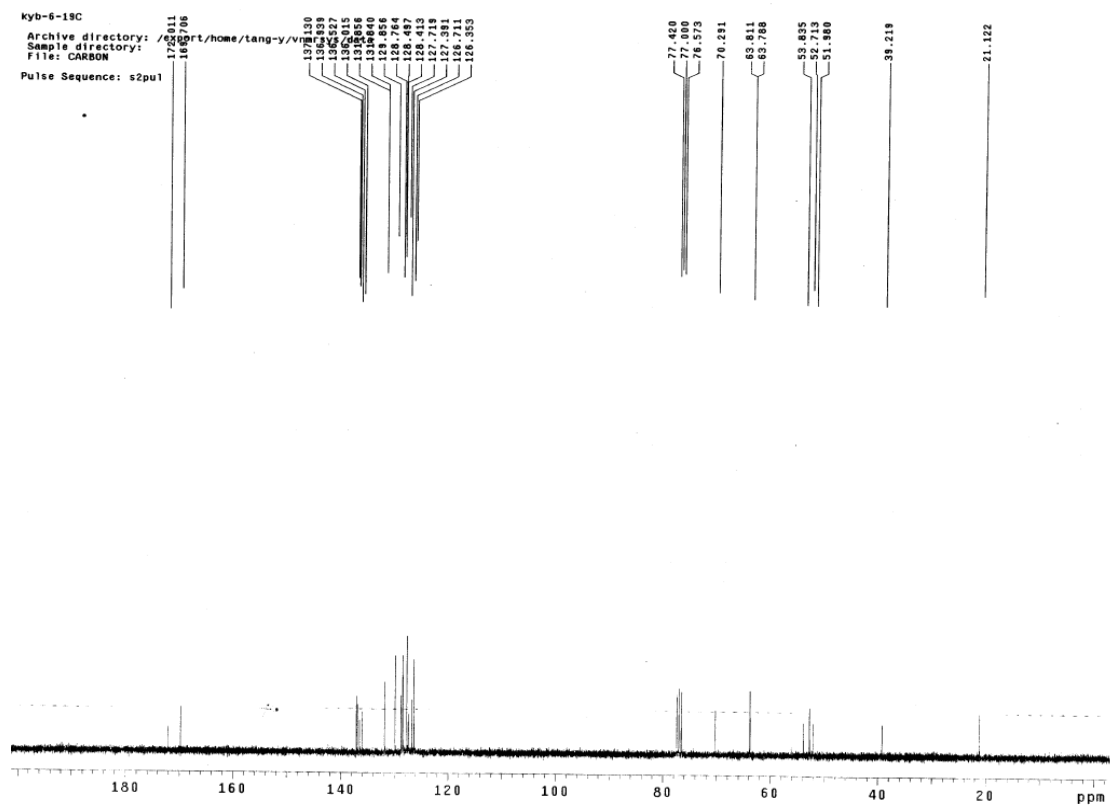

3h

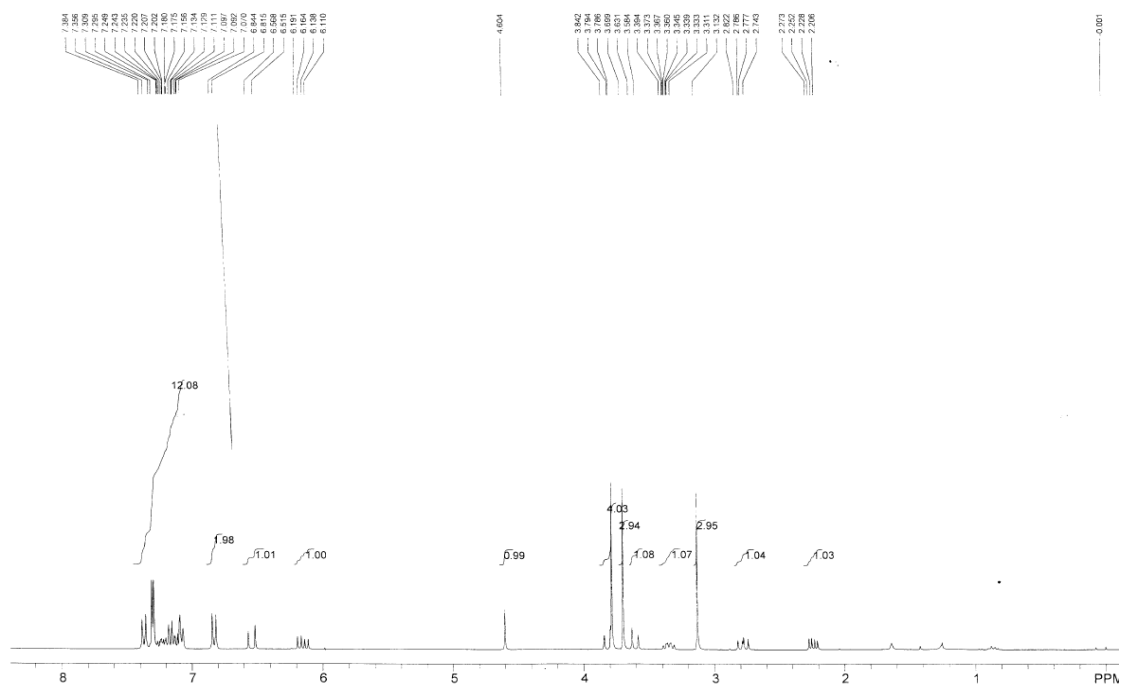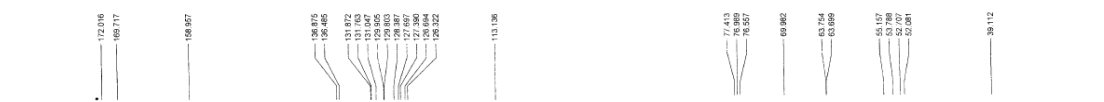

LYB-5-77

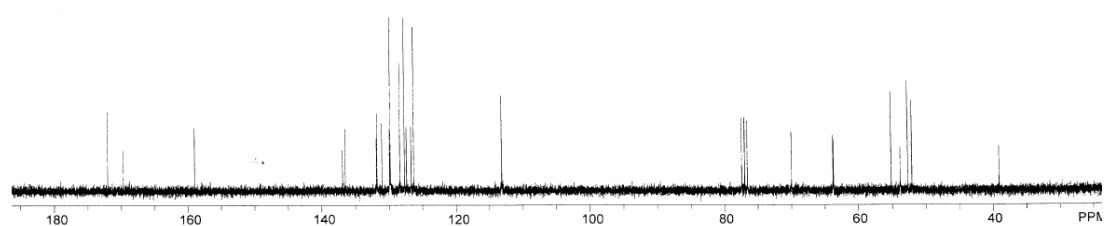

3i

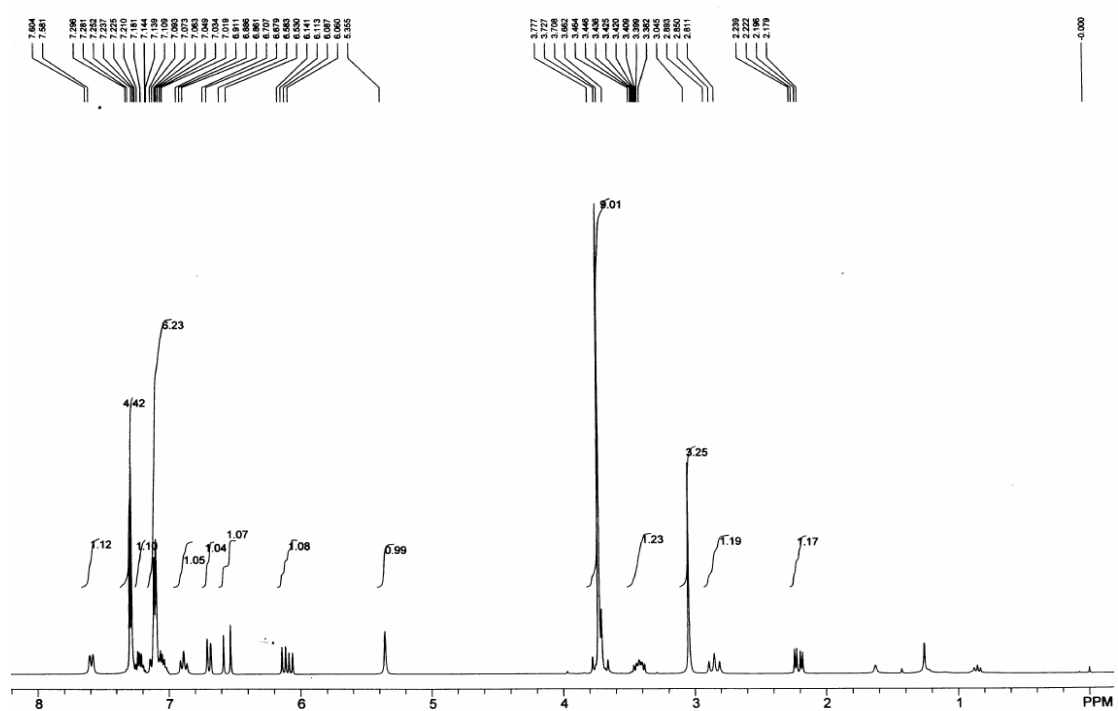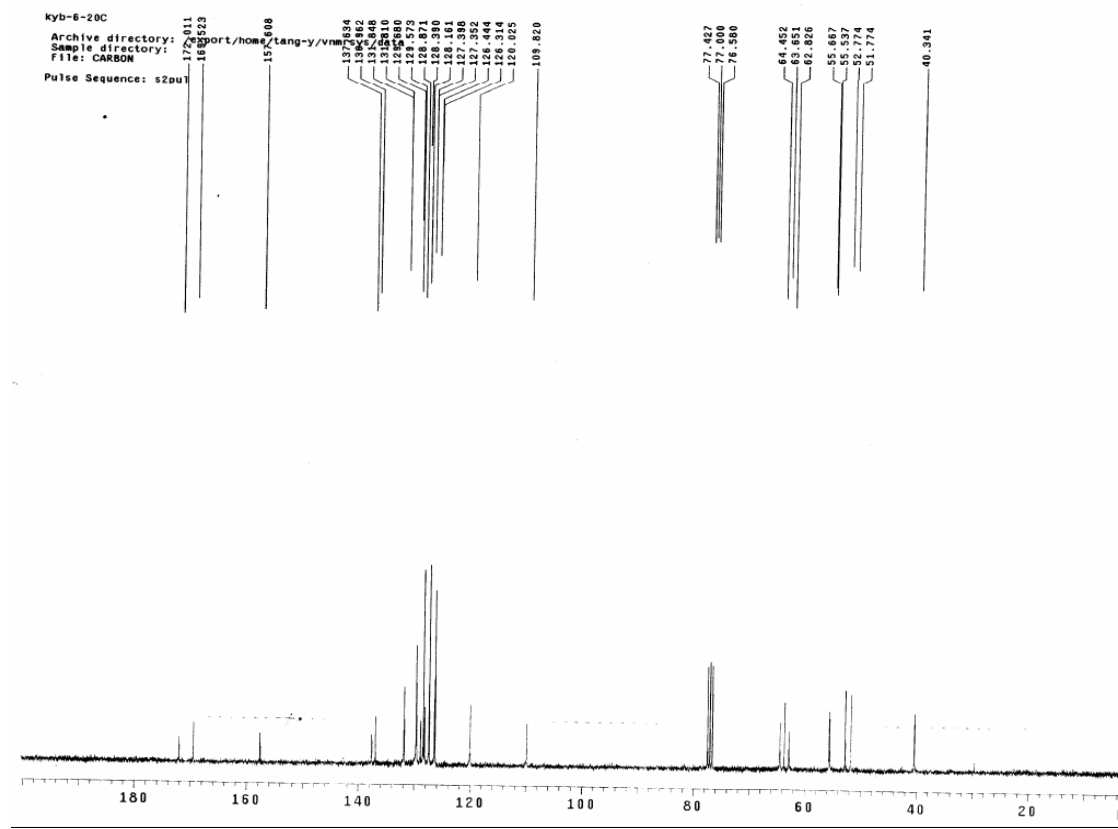

3j

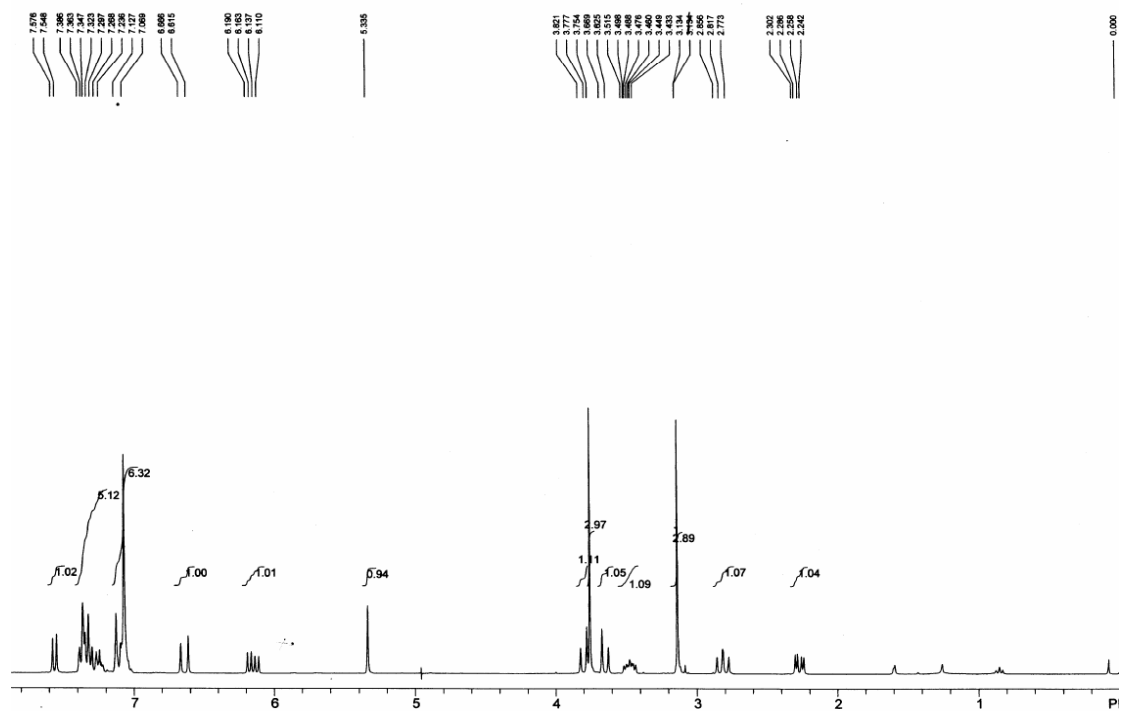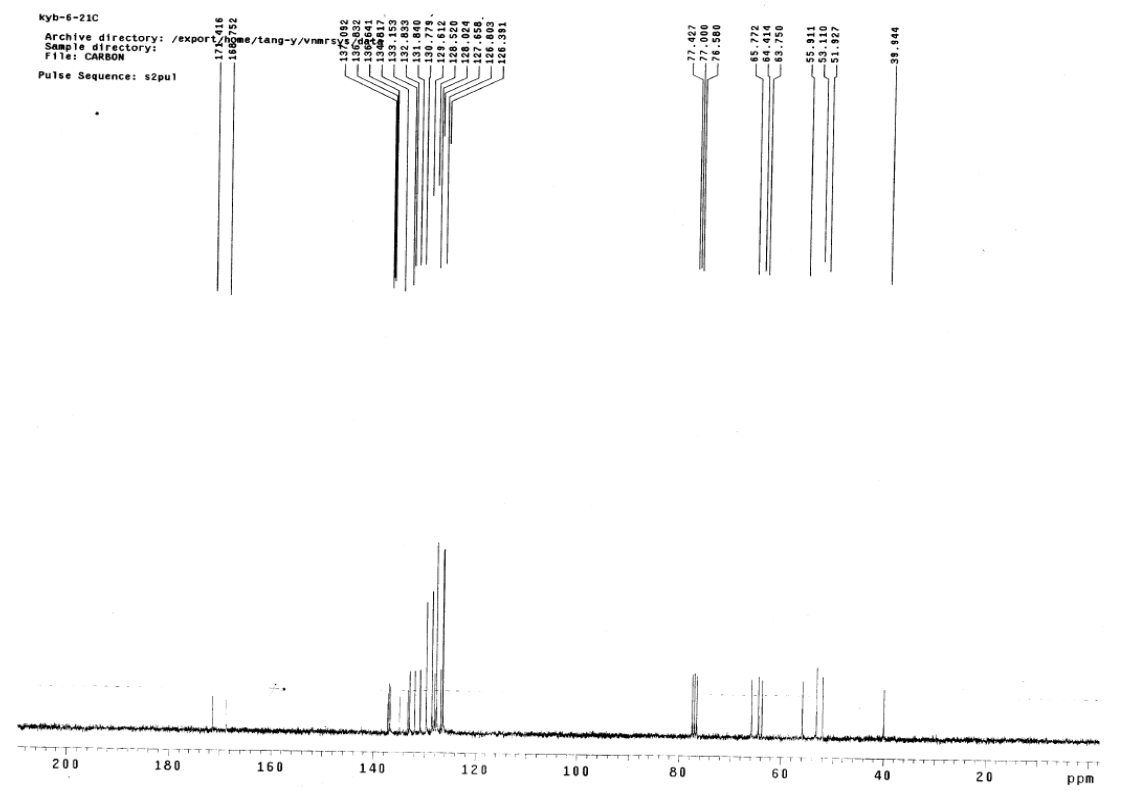

3k

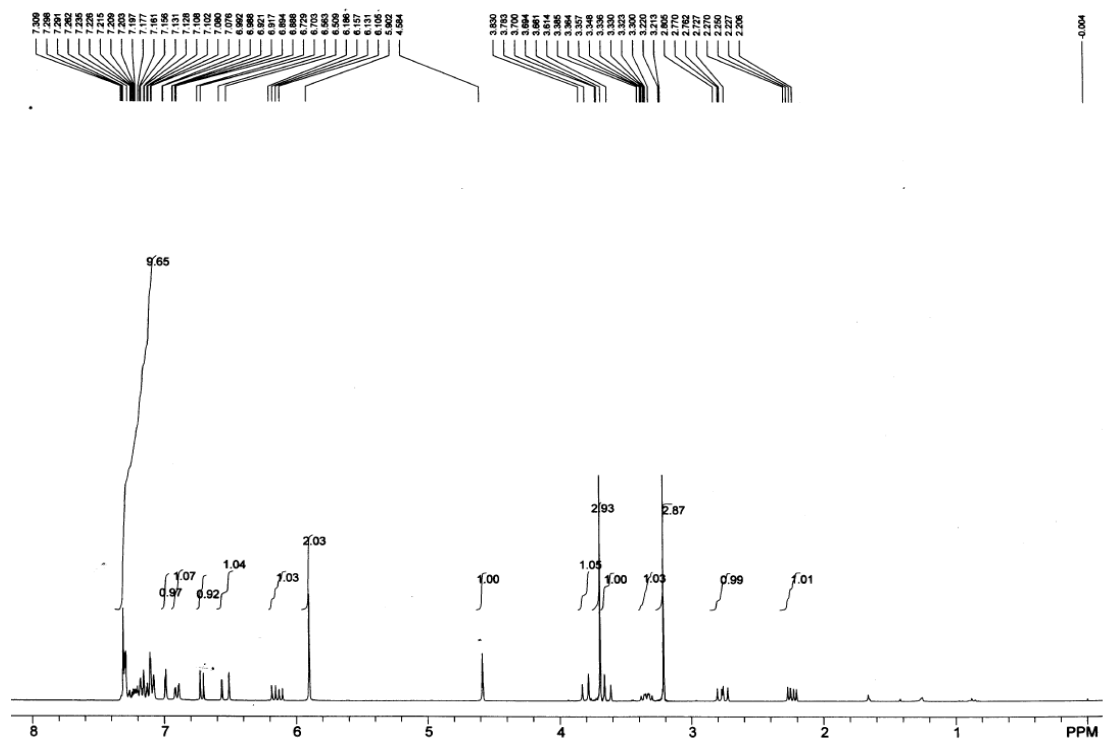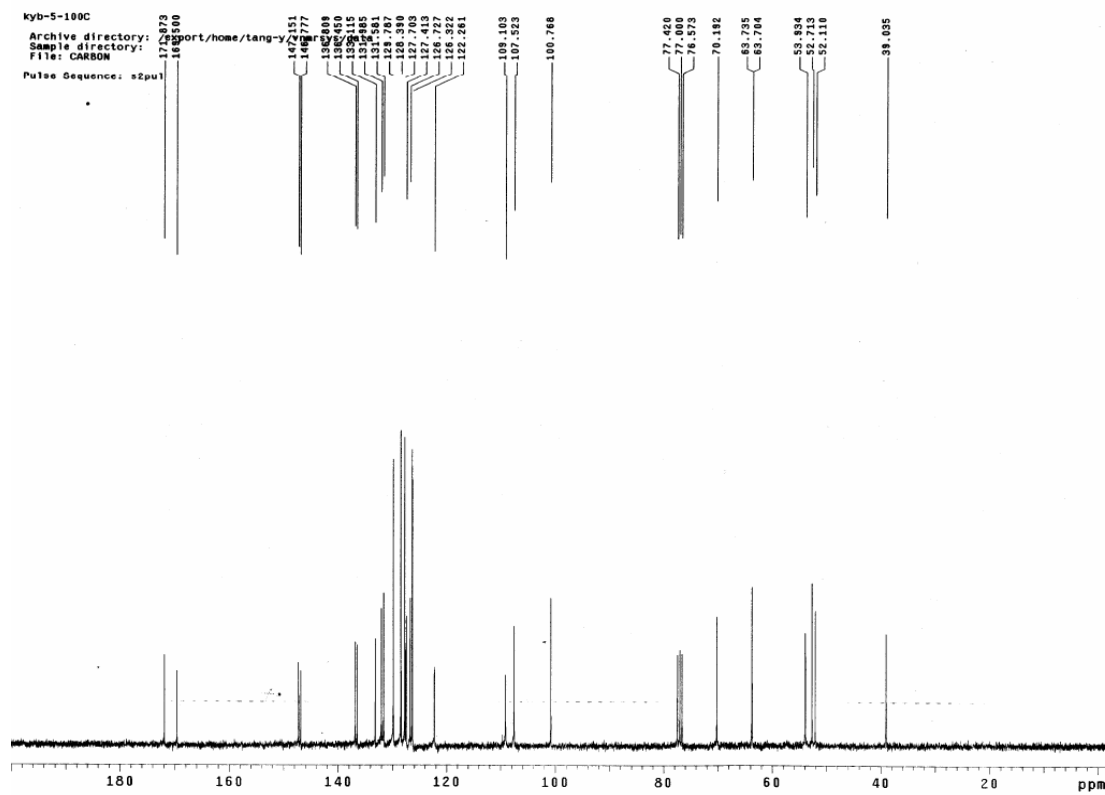

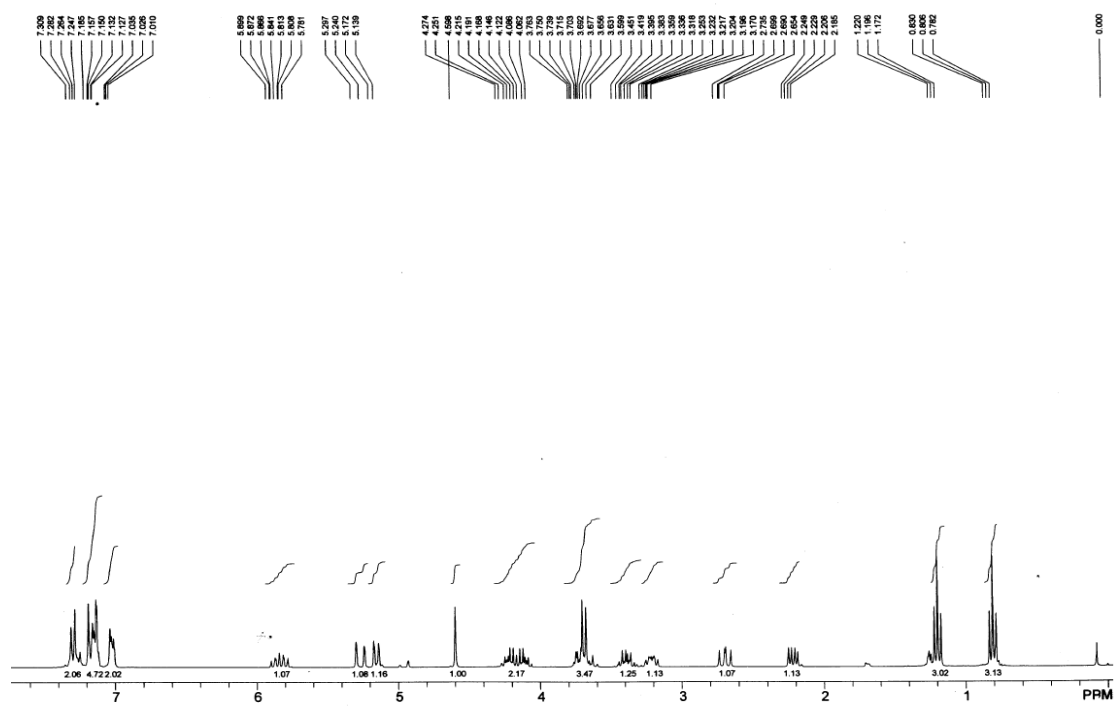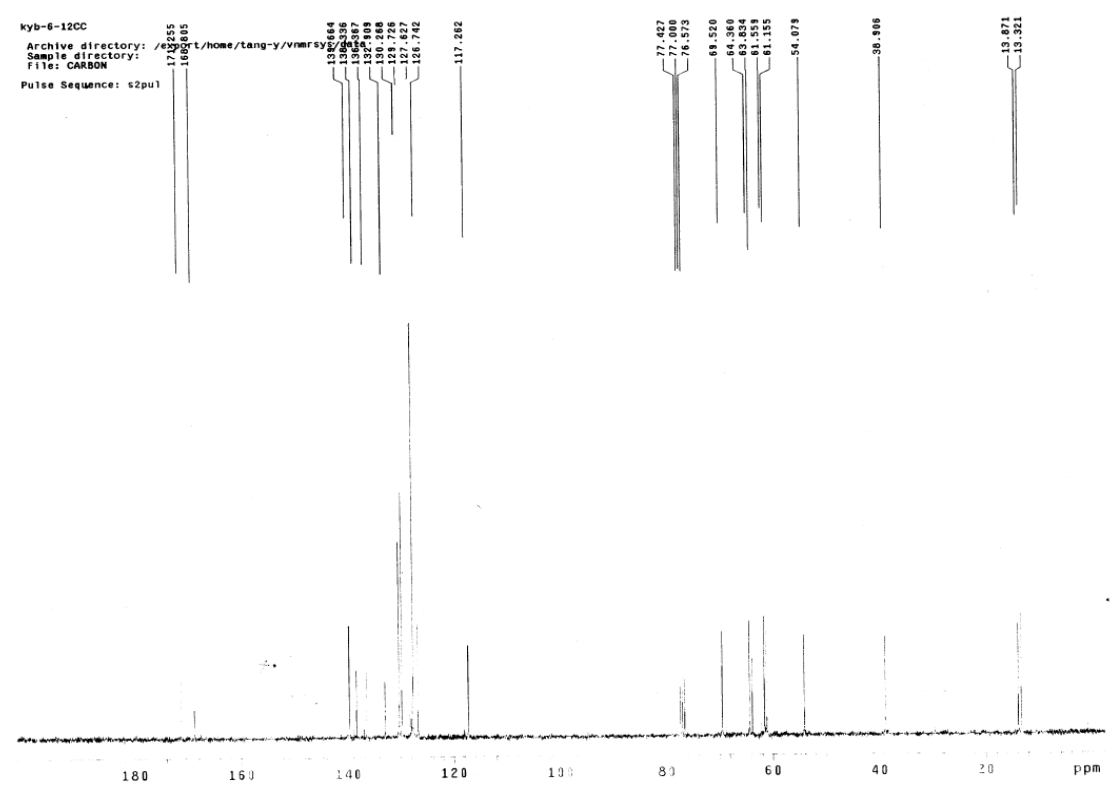

3m

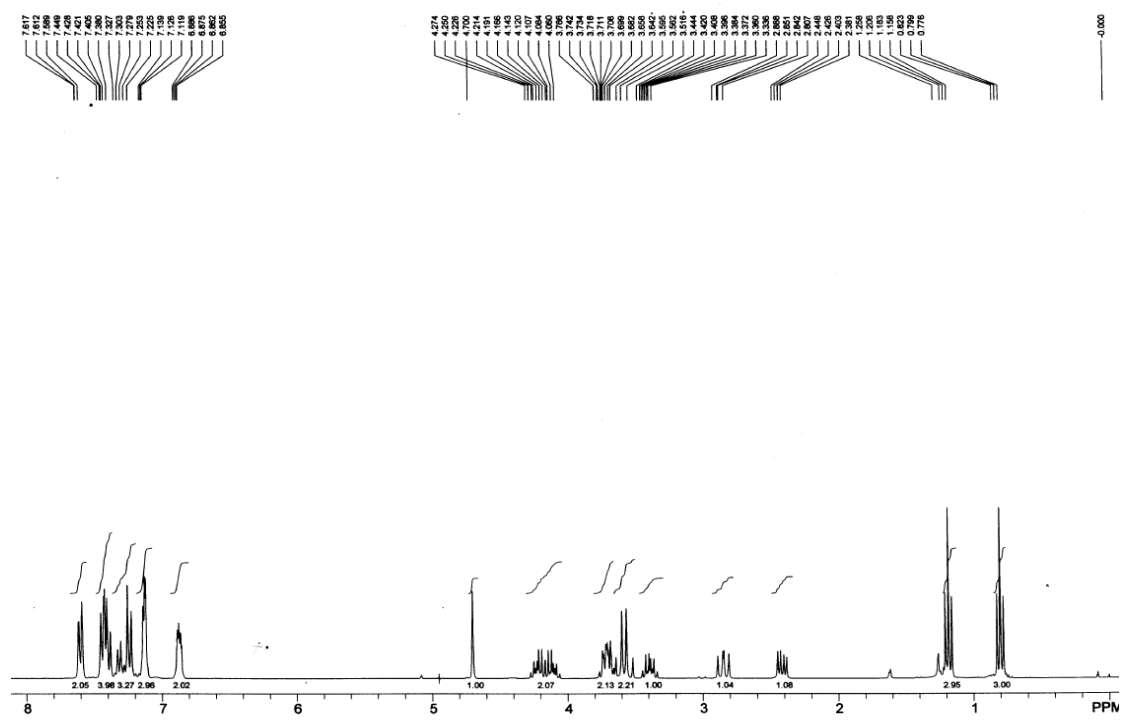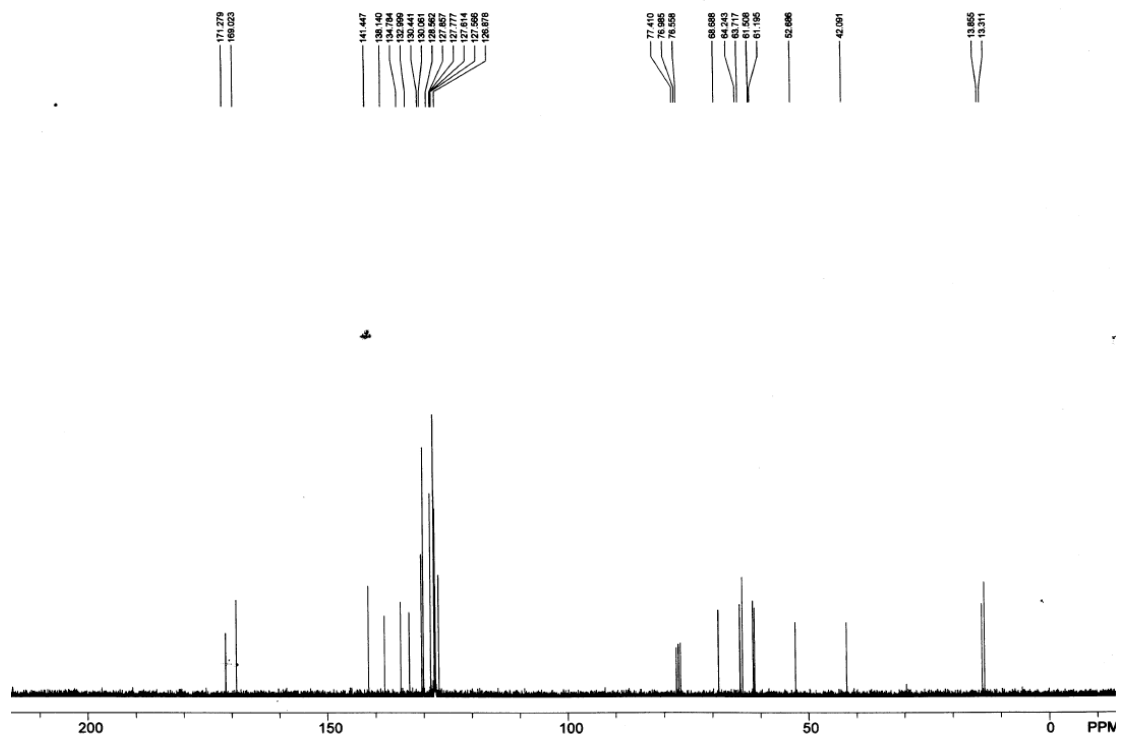

3n

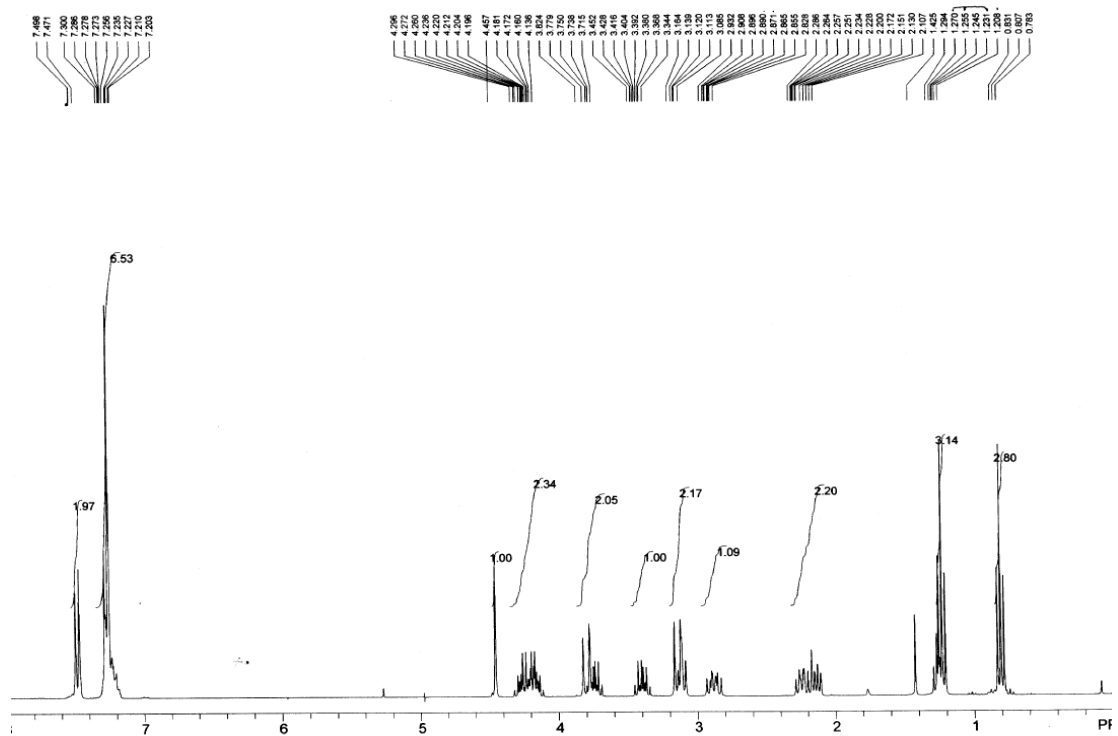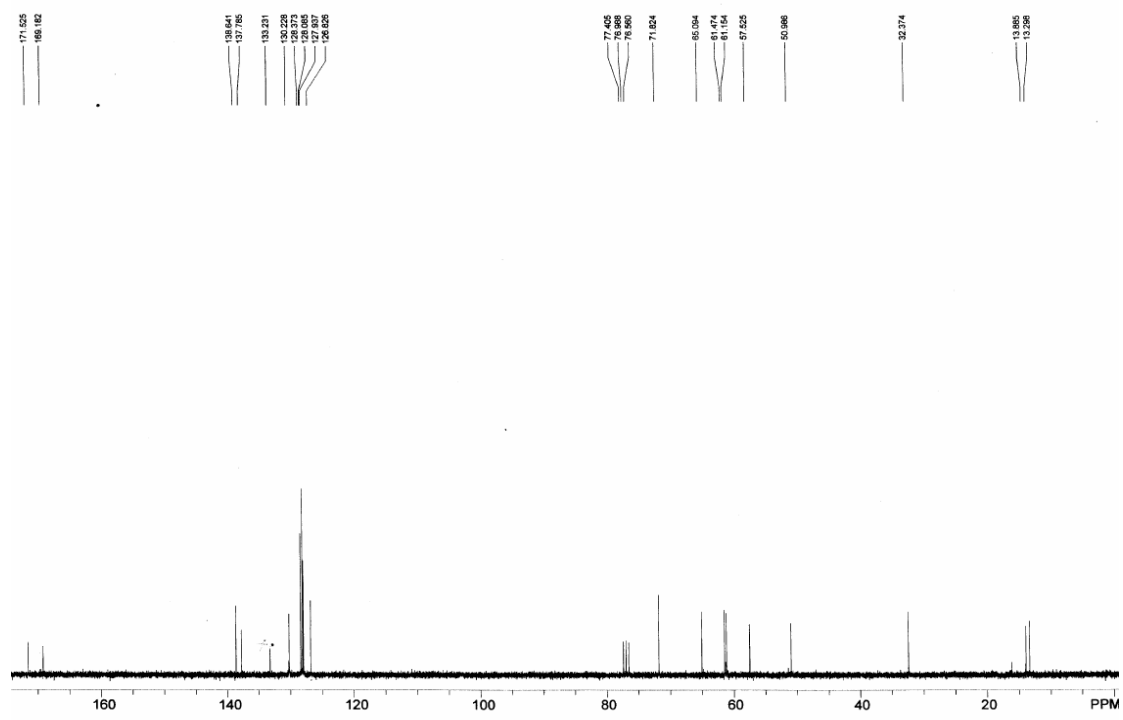



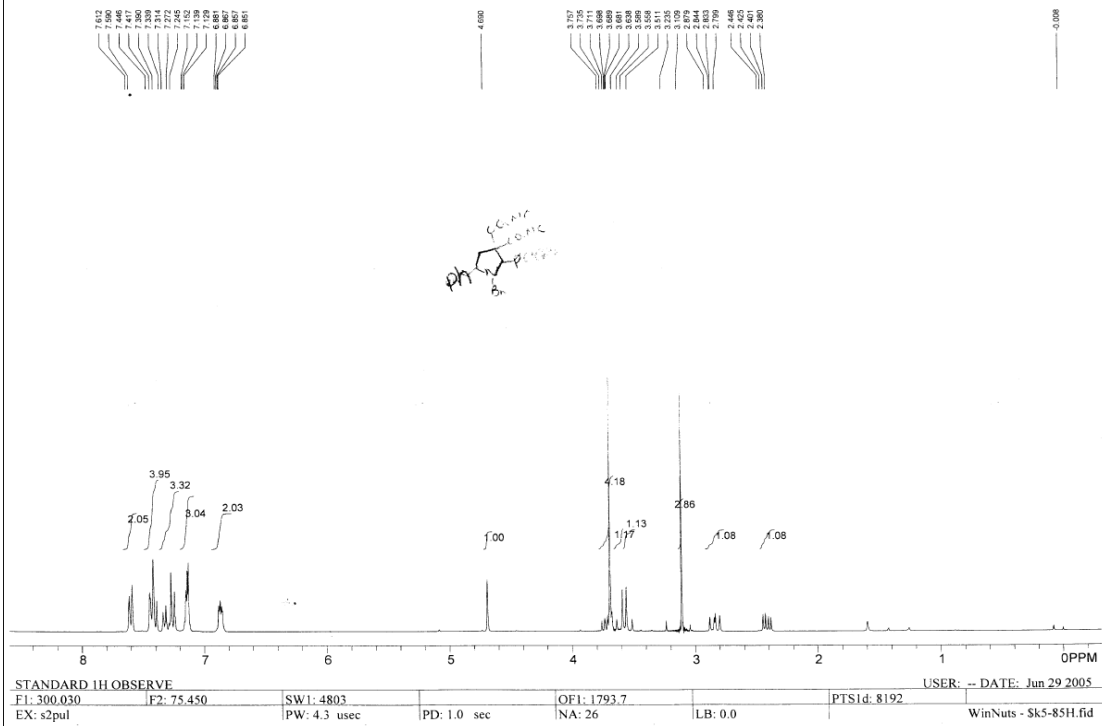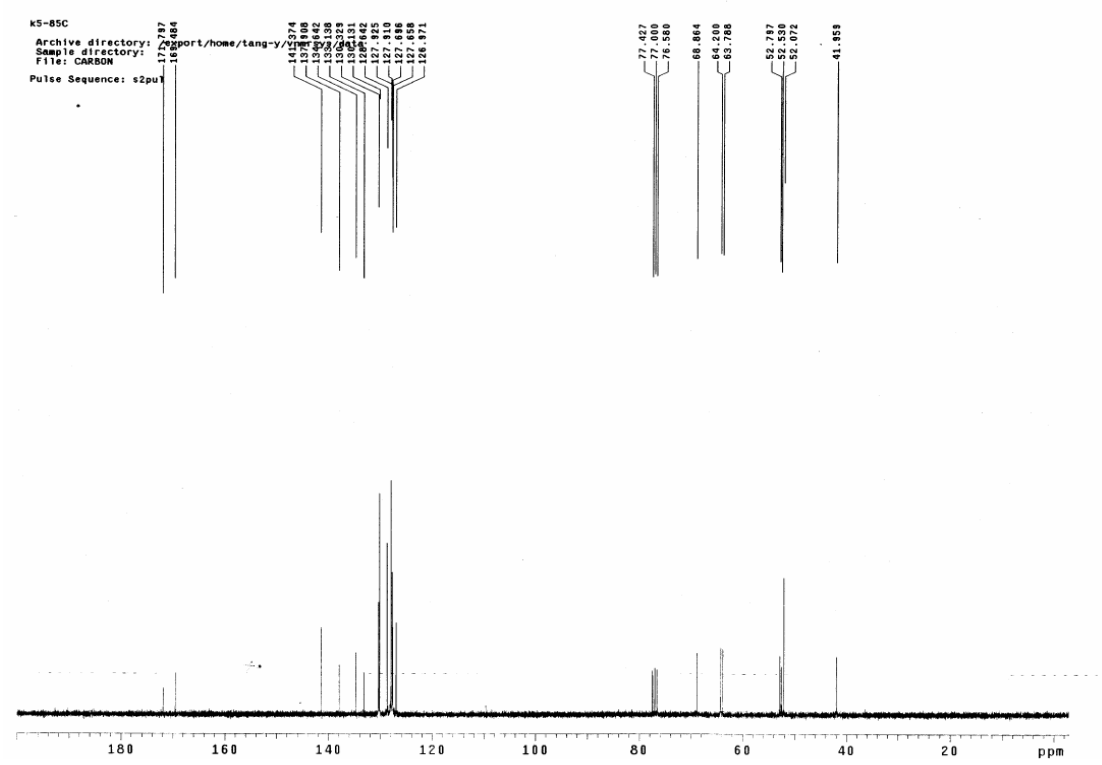

### Part 3. Stereochemical assignment

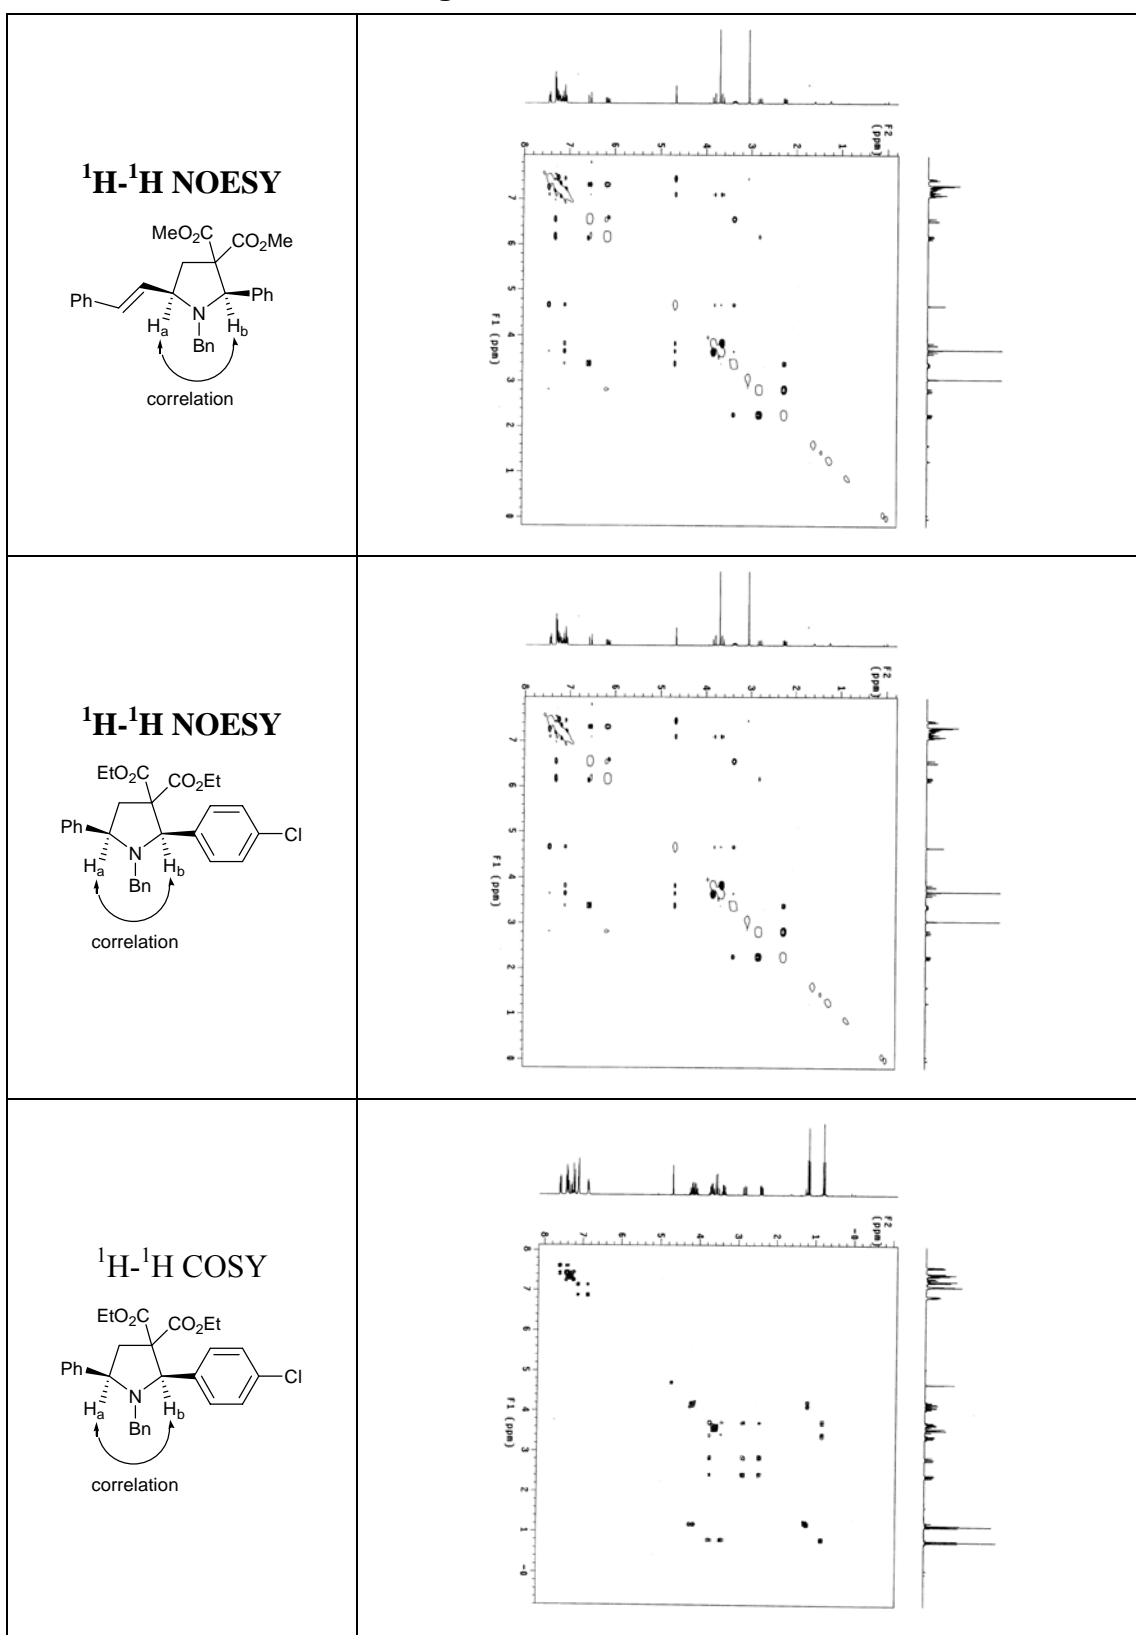

Supplement: b512195g.pdf [file b512195g.pdf]
